# Supplementary material
Source: Springer Nature journal article supplement (https://www.springermedizin.de/resource/supplementary/12889_2012_4433_MOESM1_ESM.pdf/9492726)
Supplement: MOESM1 [file 9492726]

20682 references  
identified by search

10 were duplicates  
within own database

20672 references

3209 were duplicates  
between the databases

17463 distinct references  
were screened for relevance  
by RD using title (and  
abstract) when necessary

16292 rejected as did not  
match inclusion criteria

1171 titles and abstracts  
reviewed by RD and CM

37 further duplicates

1030 rejected

70 agreed

34 differences of opinion  
were reviewed by RD,  
CM & BW

21 rejected as  
unsuitable

83 full text were  
reviewed by RD & BW

39 were included in  
final review
